# Supplementary material for: Epigenetic mechanisms linking atherosclerosis to ischemic stroke: insights from DNA methylation and transcriptome integration
Source: Front Genet. 2025 Jun 18;16:1567951. doi: 10.3389/fgene.2025.1567951 (PMC12213582; doi:10.3389/fgene.2025.1567951)
Supplement: Supplementary file 2 [file Table3.xlsx]

## Sheet: Upregulated genes
List of upregulated unique protein-coding genes (disease group vs. control group)
Gene Symbol
AATK
ABCA4
ABCA6
ABCB8
ABHD17A
ABHD5
ACOT8
ACSM3
ACTL6B
ACVRL1
ADAM18
ADAM7
ADAMTS2
ADAMTS5
ADARB2
ADGB
ADORA2A
ADRBK1
ADTRP
AFF2
AGMAT
AHSP
AICDA
AKR7A3
ALDH3A1
ALPL
ANKMY1
ANO2
APOD
AQP8
ARC
ARHGAP28
ARHGEF15
ARHGEF4
ASPSCR1
ASTN1
ATP2B2
ATP8A1
ATP8A2
BARX1
BAX
BGLAP
BIN1
BRF1
BTNL3
C16orf95
C1orf109
C5AR2
CA1
CALCB
CALCR
CAMK2B
CAPN15
CARD10
CASC5
CASP10
CASP7
CASS4
CCDC170
CCDC28B
CCDC68
CCNJL
CCR7
CD177
CD24
CD3E
CDA
CDC42EP2
CDH5
CDKL1
CDKN1C
CDKN2C
CDKN2D
CEACAM1
CEACAM21
CENPF
CERS4
CFHR4
CFP
CFTR
CGREF1
CHRNA3
CLC
CLDN14
CLEC11A
CNOT4
COBL
COLEC10
COLEC11
COQ4
CPLX2
CPN2
CRABP1
CRABP2
CREB3L1
CREM
CRLF1
CRYBB3
CSNK1G2
CST2
CX3CL1
CXCL1
CXCL5
CXCR1
CYB561
CYP2R1
DACH1
DAGLA
DAPK2
DCAF11
DENND2A
DGAT1
DGCR8
DHX34
DIO2
DLEC1
DNAH17
DNAJC28
DNMT3L
DOCK6
DOPEY2
DRD3
DRD5
DUSP9
DYNC2H1
ECE1
EDNRB
EDRF1
EGR4
EHD1
EHMT1
ELMO3
EMC10
EMX1
ENC1
EPHA3
EPHB4
EPOR
EPS15L1
EPS8L1
ETV2
F2RL1
FAM105A
FAM124B
FAM131B
FAM155A
FAM174B
FAM65B
FANCA
FANCE
FANCG
FBN2
FBXO11
FCN1
FGA
FGD1
FGF23
FJX1
FKBP8
FLAD1
FLT3
FOXA2
FPR1
FPR2
FUT2
FUT6
FZD10
GABRA5
GAP43
GATA2
GFRA2
GGT5
GJB3
GLB1L
GLB1L2
GLTSCR1
GP1BB
GPC1
GPR135
GPR25
GPR3
GPR4
GPR56
GRIK5
GRIN1
GRK6
GYPA
GYPB
HAUS7
HBD
HBG1
HDC
HEATR6
HIP1R
HIST1H2BN
HLA-DOA
HLA-DQB1
HOXA10
HOXA10-HOXA9
HOXB7
HOXD13
HSPB3
HTR3B
HTR4
HTR7
HYAL3
HYDIN
ICA1
IFNA14
IFT122
IGF1R
IGF2BP3
IGSF1
IKBKE
IL18RAP
IL1R2
IL27RA
IMPG2
INCENP
INF2
INPP4A
INSIG1
INTS5
IQCH
IQSEC3
ISG20
ISL1
ITPR2
JMJD7
JUP
KAZALD1
KAZN
KCNJ1
KCNJ2
KCNJ4
KCNN2
KDM6B
KDSR
KIAA0391
KIAA0513
KIAA0586
KIAA1324
KIAA1644
KIR2DL4
KITLG
KLF1
KLHDC8A
KLHL35
KLK1
KLK2
KLRD1
KRT19
KRT81
KSR1
LAMA3
LARS
LBP
LCK
LCT
LHPP
LILRA1
LIMK2
LOC100862671
LOC101929857
LOC102725198
LOC254896
LOC339166
LPA
LPHN1
LRRC2
LRRC36
LY6E
MAGED4
MALT1
MAP1A
MAPK11
MAPK4
MAS1
MAST2
MCM4
METTL7A
MEX3D
MIER2
MINK1
MLC1
MLLT4
MMP11
MMP23A
MMP25
MOGS
MOK
MORC1
MR1
MRPL28
MS4A2
MSMB
MTAP
MTOR
MYBPC1
MYO16
MYO1B
N4BP2L1
NABP2
NADK
NAT6
NCR3
NDUFA7
NECAB2
NEFL
NEUROG2
NKX3-2
NLRP3
NME5
NOC2L
NOS1
NOX1
NPAP1
NPAS2
NPY5R
NR2F6
NR5A2
NRG1
NTN3
NTRK2
NUP188
OLFM1
OLFML2A
OLIG2
OPRM1
OR11A1
OR2H2
OSBPL7
OSR2
P2RY10
P2RY13
PADI4
PAK4
PAMR1
PAQR3
PARVB
PDCD5
PDE10A
PEX5
PFDN4
PHF7
PHLDA3
PI3
PKP1
PKP4
PLCB1
PLCL2
PLEKHA4
PLSCR2
PML
PNMA3
POU3F3
PPCDC
PPIL2
PPP1R7
PRAMEF1
PRND
PROC
PROP1
PRSS3
PTGS1
PTK2B
PTPRR
RAB15
RAB27B
RARA
REM1
RFXANK
RGS7
RGS9
RGSL1
RNASE3
RNASEH2B
RNF126
RPL10L
RRP7A
RYK
S100A12
S100A3
SAMD9
SARDH
SCAMP3
SCARF1
SCUBE2
SDF4
SELL
SEMA3A
SEMA3F
SERPINA5
SFRP5
SH2D1A
SH2D4A
SHC2
SHPK
SHROOM2
SIDT1
SIGLEC7
SIGLEC8
SIRPB1
SIRT2
SIX3
SLC12A5
SLC13A1
SLC27A5
SLC44A1
SLC4A3
SLC4A4
SLC6A2
SLC8A1
SLC9A5
SLN
SNAI1
SNTB2
SOX1
SOX3
SPIB
SRGAP3
SSX2
STATH
STC1
STK38
STXBP6
SUGP1
SULT1B1
SULT1E1
SUN1
SYDE1
SYNGR1
TADA2A
TAL1
TBC1D30
TBCD
TBR1
TBX5
TBXA2R
TCEB2
TCL1A
TESK2
TESPA1
TEX13B
TFF2
TGFB1
TH
TIMM44
TK2
TKTL1
TMC7
TMEM158
TMEM189
TMEM206
TMPRSS3
TNFSF10
TNFSF11
TNFSF9
TNR
TNXB
TOX
TPPP3
TRAF4
TRAPPC9
TRIB3
TRIM24
TRIM58
TRIM66
TRPC4
TRPM8
TSC2
TSEN2
TSPAN5
TSPAN9
TUBAL3
TUBB2B
UAP1L1
UBOX5
ULK1
UNC5B
UNC93A
UNKL
UPK1A
VAV3
VIP
WDR52
WDR78
WNT2
WNT6
WRAP73
XKR8
XRCC4
ZBED1
ZFP69B
ZKSCAN5
ZMYM1
ZMYND8
ZNF493
ZNF500
ZNF510
ZNF551
ZPR1
ZXDA

## Sheet: Downregulated genes
List of downregulated unique protein-coding genes (disease group vs. control group)
Gene Symbol
A2M
ABCD3
ABL1
ACACB
ACIN1
ACOX2
ACSS3
ACTA2
ACTC1
ACTG2
ACTN4
ADAM17
ADCY6
AHCYL1
AHNAK
AKAP1
AKAP13
AKAP17A
ALDH18A1
ALDH1B1
ALDH3A2
ALDH6A1
ALDH9A1
ALKBH1
ANKHD1
ANKRD10
ANKRD11
ANKS1A
AOC3
API5
APLP2
ARF6
ARFGEF1
ARHGEF10L
ARHGEF5
ARIH1
ARPC4
ARPP19
ASUN
ASXL1
ATG5
ATP1B1
ATP6V1H
ATR
ATXN2
ATXN7L3B
AURKA
AVL9
BBS4
BCKDHB
BCL2L2
BCL2L2-PABPN1
BMPR1B
BMPR2
BTN2A1
C10orf88
C14orf169
C1S
C3orf62
C4A
C6orf62
C9orf16
CALCOCO1
CALM1
CASP2
CBX5
CD151
CD164
CD200
CD46
CDK12
CDV3
CELF1
CENPT
CES2
CHN1
CHORDC1
CHTOP
CHURC1-FNTB
CKMT2
CLASP2
CLCN3
CLIC4
CLU
CMAS
CNBP
CNOT4
COL4A5
COPS7A
CPE
CRBN
CREB3
CREBZF
CRIPT
CRYBB2
CSNK2A1
CSPG4
CSRP1
CSTF3
CTBP2
CTBS
CTGF
CUL3
CYB5R1
CYB5R4
CYFIP1
DAXX
DAZAP2
DCP2
DCUN1D1
DDR2
DDX17
DDX3X
DDX5
DEDD
DHRS3
DIP2C
DLD
DLG1
DNAJB5
DPF2
DPT
DQ597730
DSE
DUSP12
DUSP3
E2F3
EFHD1
EHD4
EIF3I
EIF4G2
EIF5
EMC3
ENOSF1
ERAP1
ERBB2
ERBB4
ERLIN2
ETF1
EZR
FAHD2A
FAM129A
FAM168B
FAM21A
FEN1
FGFR1
FHL5
FKBP3
FLNA
FOXC1
FOXJ2
FOXN3
FOXO3
FUBP1
FUS
FZD1
FZD6
GABBR1
GCN1L1
GGA2
GK
GLIPR1
GLRX5
GLTSCR1L
GMFB
GMPR2
GNAI1
GNAL
GNL3L
GOLGA8CP
GOLGA8N
GPATCH8
GPR161
GRIA2
GSAP
GSS
GTF2F1
GTF2I
GTPBP4
HBP1
HDAC9
HELZ
HERC2
HMGN1
HMGN2
HNRNPA2B1
HNRNPD
HNRNPH1
HNRNPH2
HNRNPR
HPS5
HSF2
HSPB8
ID4
IFIH1
IGF2R
IGFBP2
IGFBP5
IGFBP7
INPP5B
IQCJ-SCHIP1
IRGQ
ISG20L2
ITGA8
ITGA9
ITGB3
ITSN1
JAK2
KCNA5
KIAA1033
KIAA1279
KIRREL
KLF10
KLHDC4
KLHL9
KMT2A
KRR1
LBH
LIMD1
LMO3
LMO4
LOC100507577
LOC101928143
LOC101930150
LPIN1
LPP
LRRC1
LYST
MAFF
MALT1
MAP3K8
MARS
MBD4
MBNL1
MCFD2
MCM3
MDC1
MED13L
MEF2A
MEF2C
MFAP4
MFGE8
MGEA5
MIEF1
MIR636
MIR6840
MKRN1
MKRN2
MLF2
MLLT10
MOB1A
MOB4
MSTO1
MTHFD1
MTMR11
MTMR3
MYH10
MYH11
MYLK
MYNN
NAA15
NBN
NCL
NCOA1
NET1
NF2
NFX1
NFYA
NGLY1
NHP2
NIPBL
NPC1
NPR2
NR1D2
NRAS
NRP1
NSUN6
NTRK3
OGT
OLFML2B
PARL
PAWR
PBX1
PCDH7
PDCD6
PDE3A
PDE8A
PDHX
PDLIM5
PDPK1
PDS5B
PELO
PER2
PGAP2
PHACTR1
PIGG
PINLYP
PIP5K1A
PKM
PLAGL1
PLD1
PLN
PNN
POLDIP2
POM121
POMZP3
PPCS
PPP1R12A
PPP1R12B
PRDM2
PRDX3
PREB
PRKAR2A
PRMT1
PRMT2
PROM1
PRPF4B
PRPS1
PRRX2
PSMD12
PSRC1
PTGER3
PTMA
PTPN11
QKI
RAB40B
RABGAP1
RAD17
RAD51B
RALY
RAPGEF2
RARRES2
RASL11B
RBBP4
RBBP7
RBL2
RBM10
RBM14-RBM4
RBM25
RBM5
RBPMS
RCBTB1
REEP1
REPS1
RERGL
RFC3
RHEB
RMND5A
RNF13
RPL15
RPRD2
RUFY2
RUNX1T1
SATB1
SCAF11
SCRG1
SCUBE3
SDC4
SDHC
SEC22A
SEC23B
SEMA3C
SEMA4C
SETBP1
SETD2
SETX
SF3A1
SF3B1
SFPQ
SFSWAP
SHOX2
SLC25A36
SLC25A4
SLC26A10
SLC35F5
SLC38A2
SLC39A9
SLC7A6
SLCO2A1
SMARCA2
SMEK2
SMN1
SMYD3
SNCAIP
SNRNP35
SNRPA1
SNX1
SON
SOS1
SOX5
SP1
SPATS2L
SPEN
SRSF5
SS18
STARD7
STAT3
STK38L
SUSD5
SUZ12
SVEP1
SYNM
TACO1
TAF9B
TBL2
TCEAL2
TDRD3
TEX2
TGM2
THRB
TIA1
TMED9
TMEM106C
TMEM147
TMEM194A
TMEM242
TMEM33
TNFAIP8
TNS1
TNS3
TOP1
TOR1AIP1
TOR1B
TPD52L1
TPM1
TPP2
TRAPPC3
TRIM26
TRIM33
TRMT5
TSC1
TSR2
TTC28
TYMS
UBAP1
UBE4B
UBTF
UGCG
UPF3A
VCL
VGLL4
VPS52
VWA5A
VWA8
WAPAL
WDR1
WDR19
WIPF2
WIPI2
WSB1
WTAP
WWP2
YBX1
YWHAB
ZBED4
ZBTB16
ZBTB40
ZCCHC10
ZDHHC17
ZMYND8
ZNF10
ZNF384
ZNF385D
ZNF440
ZNF484
ZNF532
ZNF562
